# Supplementary material for: Influence of cell size on cellular uptake of gold nanoparticles
Source: Royal Society of Chemistry journal article supplement (doi:10.1039/c6bm00171h), 2016-01-01
Supplement: c6bm00171h1.pdf [file c6bm00171h1.pdf]

## Supporting Information

# Influence of Cell Size on Cellular Uptake of Gold Nanoparticles

Xinlong Wang<sup>1,2</sup>, Xiaohong Hu<sup>1,3</sup>, Jingchao Li<sup>1,2</sup>, Adriana C Mulero Russe<sup>1,4</sup>, Naoki Kawazoe<sup>1</sup>, Yingnan Yang<sup>3</sup> and Guoping Chen<sup>1,2\*</sup>

<sup>1</sup>Tissue Regeneration Materials Unit, International Center for Materials Nanoarchitectonics, National Institute for Materials Science, 1-1 Namiki, Tsukuba, Ibaraki 305-0044, Japan.

<sup>2</sup>Graduate School of Pure and Applied Sciences, University of Tsukuba, 1-1-1 Tennodai, Tsukuba, Ibaraki 305-8571, Japan.

<sup>3</sup>Graduate School of Life and Environmental Science, University of Tsukuba, 1-1-1 Tennodai, Tsukuba, Ibaraki 305-8571, Japan.

<sup>4</sup>Chemical Engineering, University of Puerto Rico, Mayaguez, PR 00681 USA.

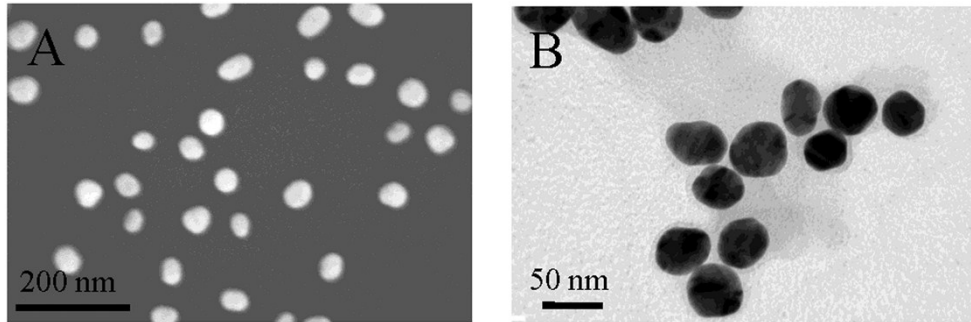

**Supplementary Figure 1.** Characterization of citrate-AuNPs. (A) and (B) are SEM and TEM images of the citrate-AuNPs.

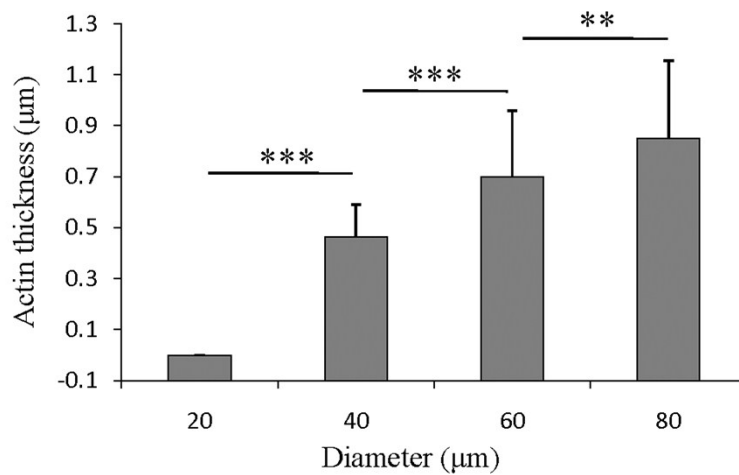

**Supplementary Figure 2.** The thickness of the F-actin filaments of the micropatterned MSCs that were cultured on the micropatterns with microdots having diameters of 20, 40, 60 and 80 μm for 6 h.  $**p < 0.01$  and  $***p < 0.001$  (n = 80).

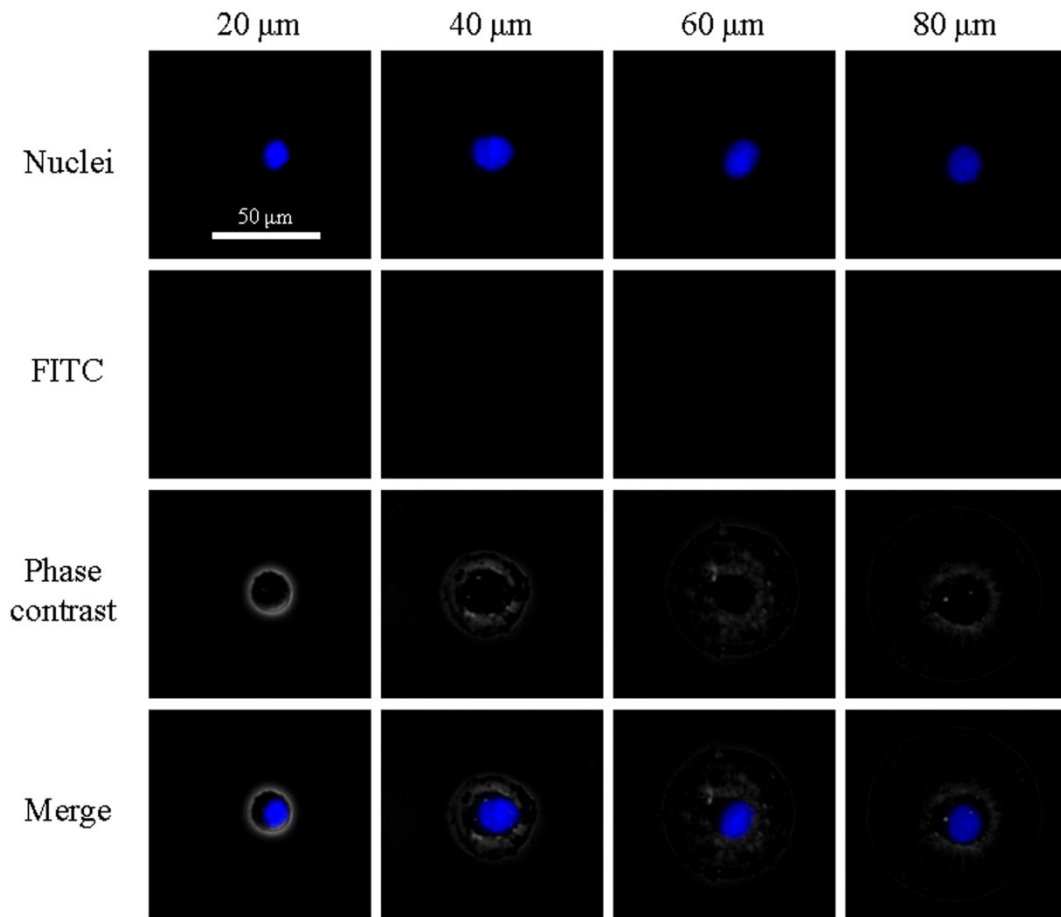

**Supplementary Figure 3.** Fluorescence images of the micropatterned MSCs after being cultured on the micropatterned surfaces for 24 h without treatment of FITC-PEG-AuNPs.

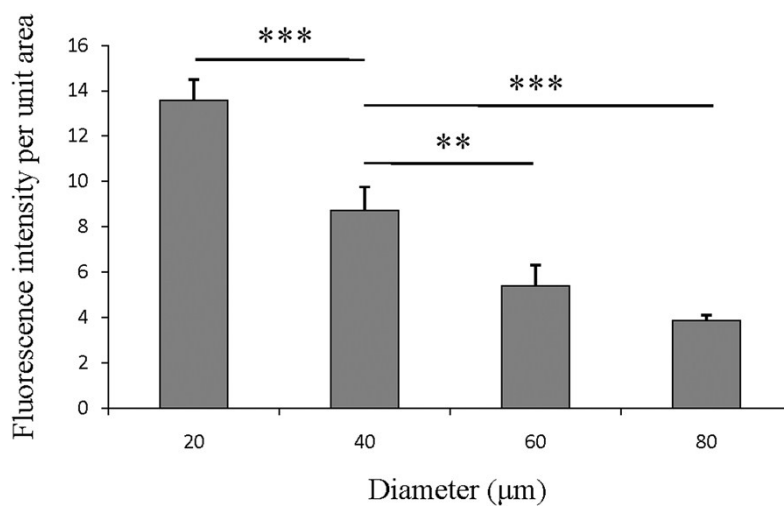

**Supplementary Figure 4.** Average fluorescence intensity per unit membrane area of the micropatterned MSCs when the 20 μm diameter cells were treated as hemispherical shape. \*\* $p < 0.01$  and \*\*\* $p < 0.001$  ( $n = 3$ ).
